# Supplementary material
Source: PubMed Central journal article supplement (PMC4113066)

SUPPLEMENTARY DATA

**Supplementary Figure 1.** Scheme showing how endocrine cell types were identified after dispersion using imaging of  $[Ca^{2+}]_i$ . A:  $[Ca^{2+}]_i$  responses to KCl depolarization, kainate and GABA allow distinguishing beta, alpha, and delta cells in dispersed islet preparations. Stimuli are applied in random order at the end of the experiment. B: Traces of  $[Ca^{2+}]_i$  responses of 2 beta cells (blue), 2 alpha cells (green), and 2 exocrine cells (grey) showing responses to acetylcholine (10  $\mu$ M) in beta cells and exocrine cells but not alpha cells. Alpha cells responded to kainate (100  $\mu$ M).

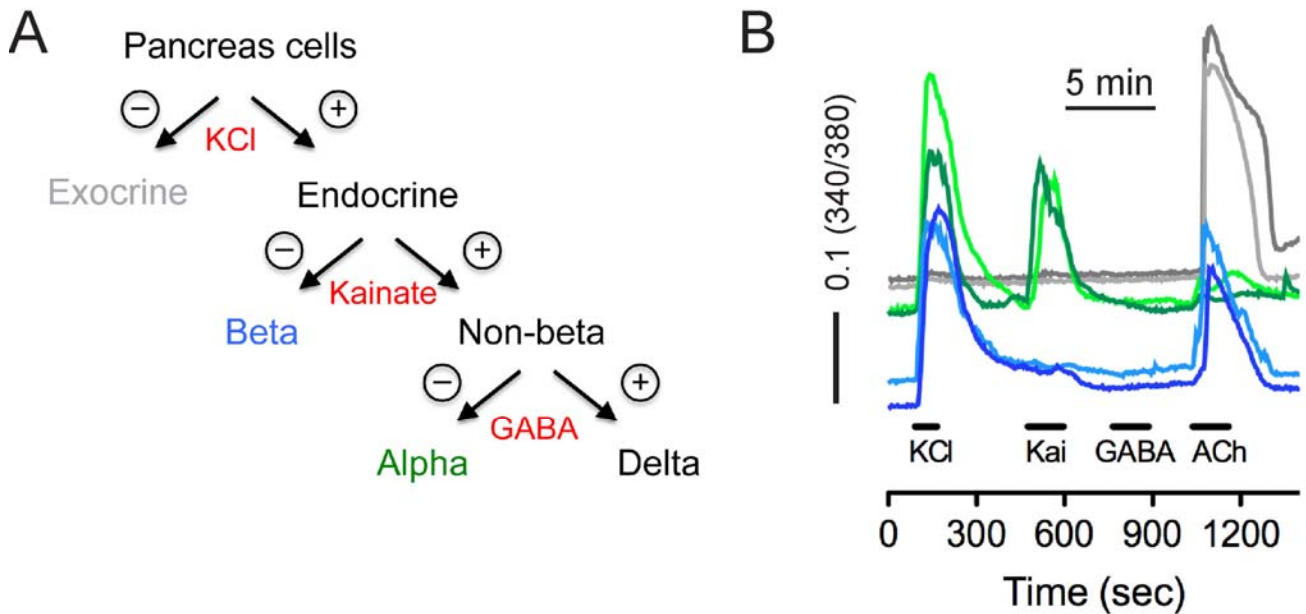

SUPPLEMENTARY DATA

**Supplementary Figure 2.** Characterization of somatostatin biosensor cells. A: Schematic of the biosensor cell approach. Responses in the somatostatin biosensor cells were recorded by loading cells with Fura-2 and imaging cytoplasmic  $[Ca^{2+}]_i$ . B: Dose-response relationship of somatostatin biosensors cells expressing the somatostatin receptor 3 coupled to the promiscuous G protein  $G\alpha_{15}$  (mean  $\pm$  SEM from 9 biosensor cells). Somatostatin-28 was used as agonist. C: Somatostatin-28 (100 nM) reliably elicits  $[Ca^{2+}]_i$  responses in somatostatin biosensor cells (mean  $\pm$  SEM from 11 biosensor cells). Shaded portion of the trace shows prolonged application of somatostatin-28. D:  $[Ca^{2+}]_i$  responses to somatostatin-28 (1  $\mu$ M) are completely blocked by the somatostatin receptor antagonist cyclosomatostatin (10  $\mu$ M). Cyclosomatostatin was present throughout the shaded portion of the trace (mean  $\pm$  SEM from 11 biosensor cells).

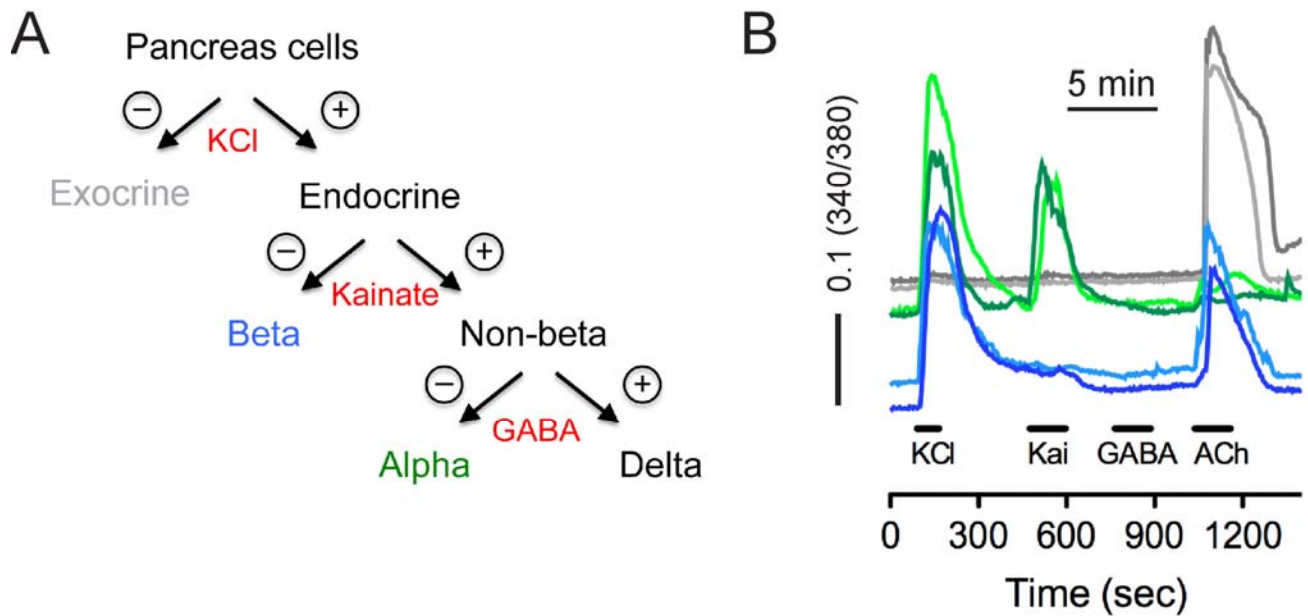

SUPPLEMENTARY DATA

**Supplementary Figure 3.** Blocking M3 receptors reduces insulin responses to changes in glucose concentration. Perfusion assay showing that the M3 receptor antagonist J-104129 (50 nM) reduced insulin responses to multiple increases in glucose concentration to 11 mM (11G).

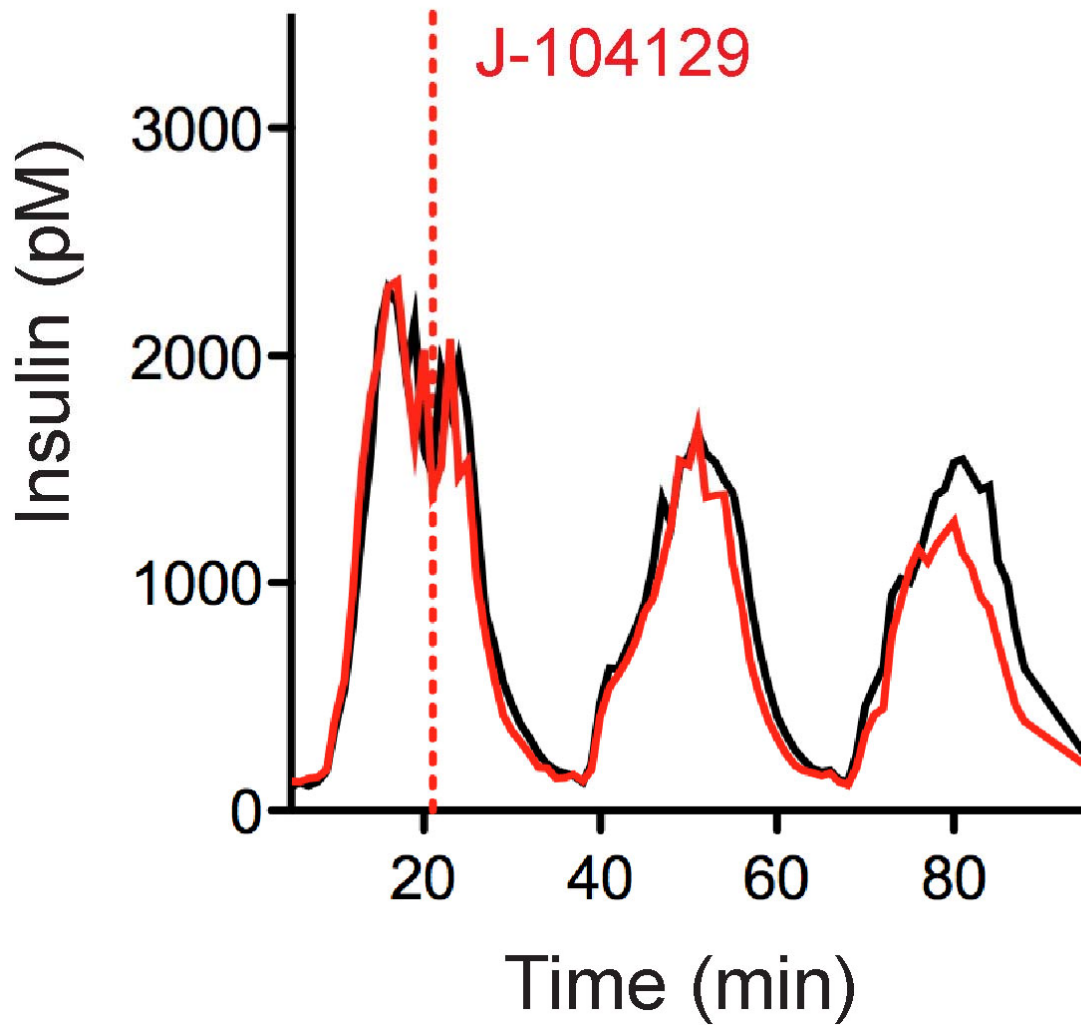

Supplement: supp_db13-1371_DB131371SupplementaryData.pdf [file supp_db13-1371_DB131371SupplementaryData.pdf]
